# Supplementary material for: Adsorption of Pb2+ by Activated Carbon Produced by Microwave Assisted K2CO3 Activation of Leaf Sheath Fibre of Date Palm
Source: Preprints.org preprint supplement (doi:10.20944/preprints202309.0321.v1), 2023-09-06
Supplement: Supplementary file 1 [file supplementary]

## Supplementary material for

*Article*

# Adsorption of Pb<sup>2+</sup> by activated carbon produced by microwave assisted K<sub>2</sub>CO<sub>3</sub> activation of leaf sheath fibre of date palm

Khaled D. Alotaibi <sup>1,\*</sup>, Bassim H. Hameed <sup>2</sup>, Hattan A. Alharbi <sup>3</sup>, Saud S. Aloud <sup>1</sup>, John P. Giesy <sup>4,5,6</sup>

<sup>1</sup> Department of Soil Science, College of Food and Agriculture Sciences, King Saud University, P.O. Box 2460, Riyadh 11451, Saudi Arabia

<sup>2</sup> Department of Chemical Engineering, College of Engineering, Qatar University, P.O. Box 2713, Doha, Qatar

<sup>3</sup> Department of Plant Protection, College of Food and Agriculture Sciences, King Saud University, P.O. Box 2460, Riyadh 11451, Saudi Arabia

<sup>4</sup> Department of Veterinary Biomedical Sciences and Toxicology Centre, University of Saskatchewan, Saskatoon, SK S7N 5B3, Canada

<sup>5</sup> Department of Integrative Biology and Integrative Toxicology Program, Michigan State University, East Lansing, MI 48824, USA

<sup>6</sup> Department of Environmental Sciences, Baylor University, Waco, TX 76798, USA

\* Correspondence: khalotaibi@ksu.edu.sa

## Captions

**Table S1** Kinetic parameters for Pb<sup>2+</sup>-LSDPFAC adsorption system.

**Table S2** Thermodynamic parameters.

**Table S1.** Kinetic parameters for Pb<sup>2+</sup>-LSDPFAC adsorption system.

| C <sub>0</sub> (mg/L) | q <sub>e, exp</sub> (mg/g) | Pseudo-first order (PFO)   |                                     |      |                | Pseudo-second order (PSO)  |                                                        |      |                |
|-----------------------|----------------------------|----------------------------|-------------------------------------|------|----------------|----------------------------|--------------------------------------------------------|------|----------------|
|                       |                            | q <sub>e, cal</sub> (mg/g) | k <sub>1</sub> (min <sup>-1</sup> ) | RMSE | R <sup>2</sup> | q <sub>e, cal</sub> (mg/g) | k <sub>2</sub> (g mg <sup>-1</sup> min <sup>-1</sup> ) | RMSE | R <sup>2</sup> |
| <b>1</b>              | 0.97                       | 0.38                       | 0.0061                              |      | 0.9251         | 0.86                       | 0.11679                                                |      | 0.9994         |
| <b>2</b>              | 1.91                       | 1.07                       | 0.0089                              |      | 0.9356         | 1.86                       | 0.02425                                                |      | 0.9979         |
| <b>4</b>              | 3.69                       | 2.25                       | 0.0086                              | 1.48 | 0.9410         | 3.60                       | 0.01050                                                | 0.22 | 0.9971         |
| <b>6</b>              | 5.46                       | 3.83                       | 0.0078                              |      | 0.9407         | 5.32                       | 0.00504                                                |      | 0.9985         |
| <b>8</b>              | 7.09                       | 5.08                       | 0.0075                              |      | 0.9713         | 6.76                       | 0.00394                                                |      | 0.9977         |
| <b>10</b>             | 8.76                       | 6.94                       | 0.0069                              |      | 0.9832         | 8.38                       | 0.00231                                                |      | 0.9895         |

**Table S2.** Thermodynamic parameters.

| Temperature (K) | ΔH° (kJ/mol) | ΔS° (kJ/mol K) | E <sub>a</sub> (kJ/mol) | ΔG° (kJ/mol) |
|-----------------|--------------|----------------|-------------------------|--------------|
| <b>303.15</b>   |              |                |                         | -31.28       |
| <b>313.15</b>   | 6.39         | 0.12           | 15.90                   | -32.53       |
| <b>323.15</b>   |              |                |                         | -33.77       |
